# Supplementary material for: Technical note: Precipitation-phase partitioning at landscape scales to regional scales
Source: Copernicus journal article supplement (doi:10.5194/hess-24-5317-2020), 2020-11-14
Supplement: Supplementary file 1 [file hess-24-5317-2020-supplement.pdf]

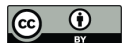

*Supplement of*

## **Technical note: Precipitation-phase partitioning at landscape scales to regional scales**

**Elissa Lynn et al.**

*Correspondence to:* Benjamin J. Hatchett ([benjamin.hatchett@gmail.com](mailto:benjamin.hatchett@gmail.com))

The copyright of individual parts of the supplement might differ from the CC BY 4.0 License.

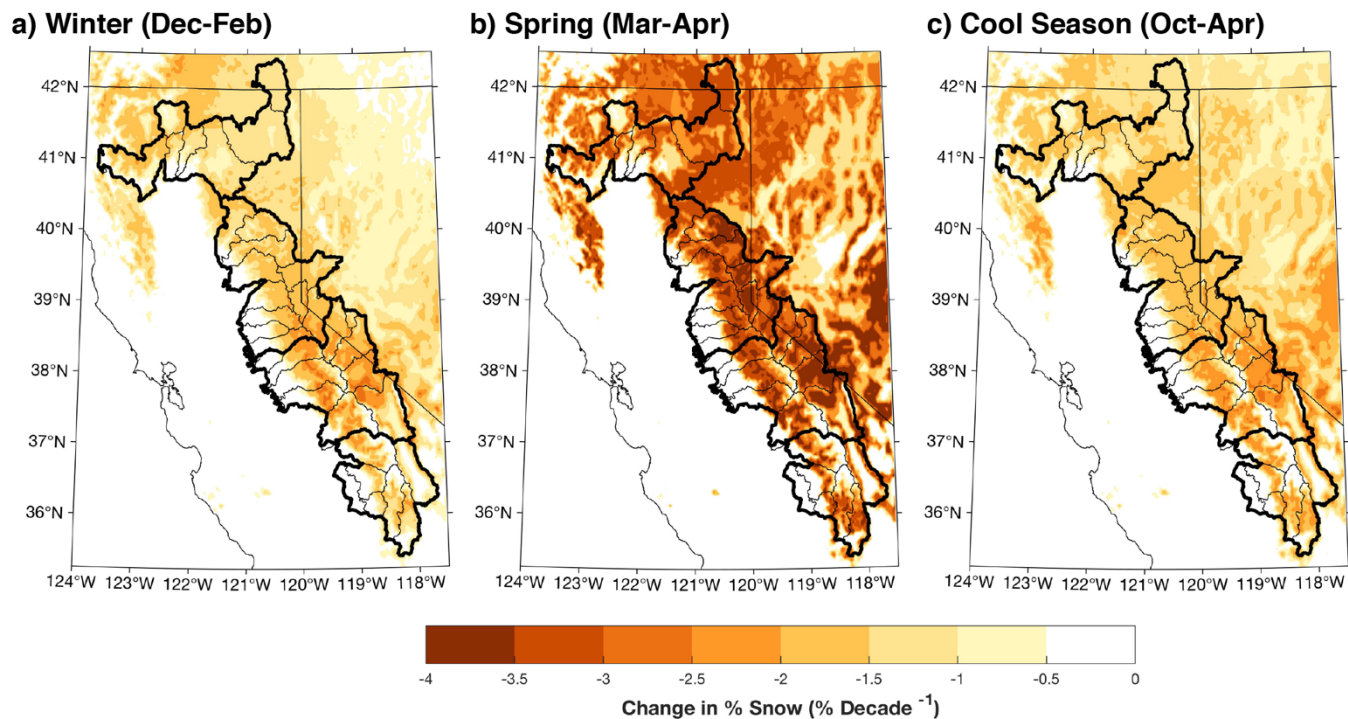

**Figure S1: Estimated changes in %<sub>SNOW</sub> (in % decade<sup>-1</sup>) for (a) winter (Dec-Feb), (b) spring (Mar-Apr), and (c) for the full cool season (Oct-Apr) for all gridpoints. Thick black contours denote California Department of Water Resources analysis zones. Thin black contours denote United States Geological Survey HUC-8 watersheds.**

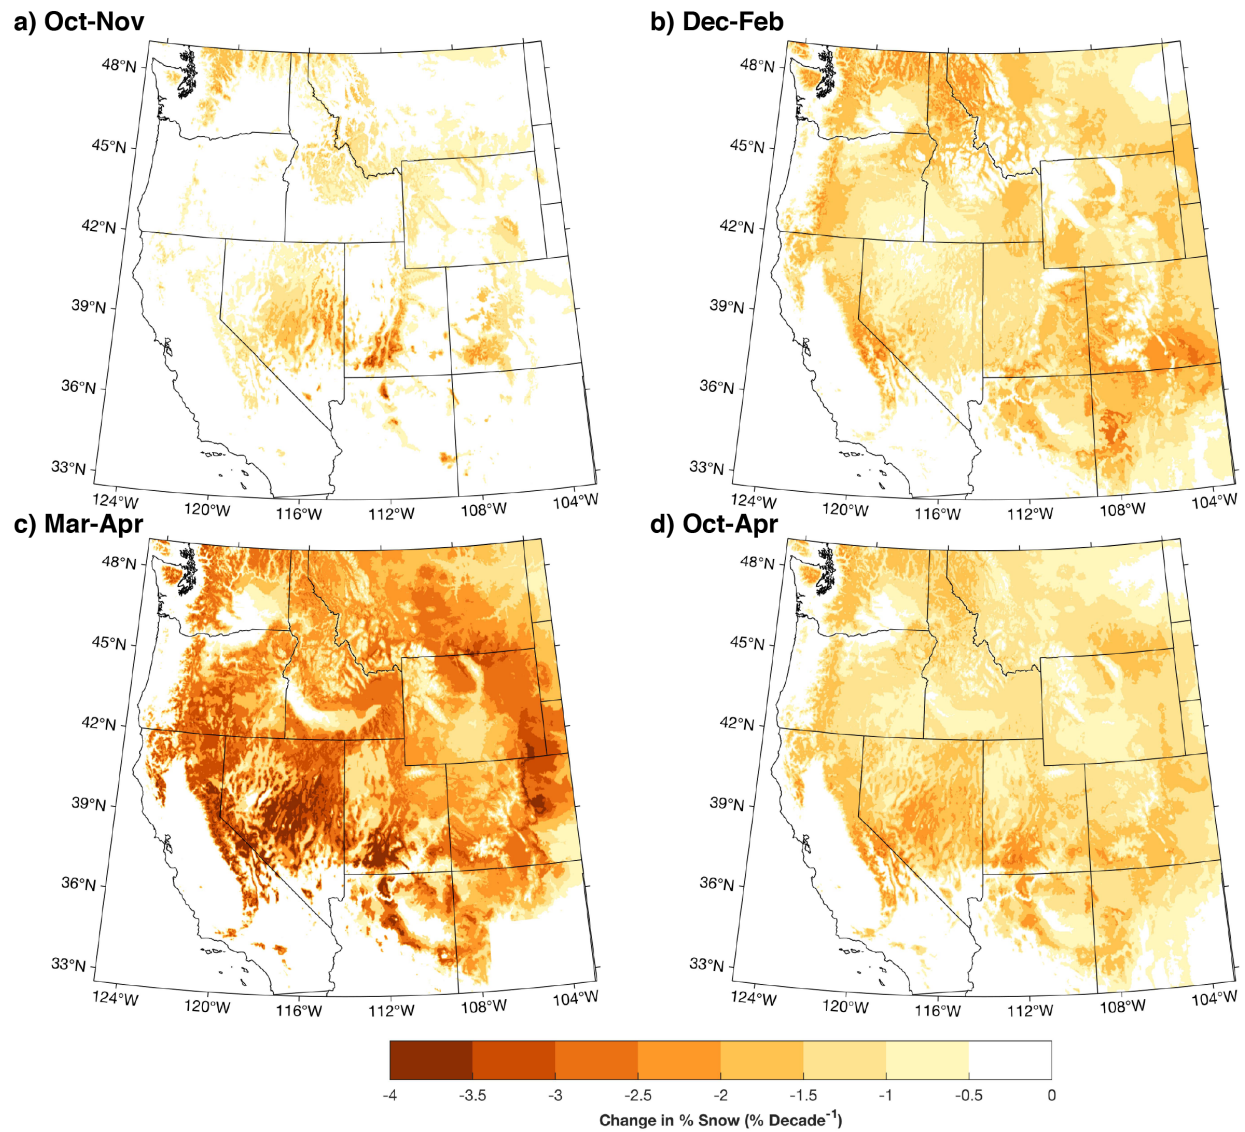

**Figure S2: Decadal trends in %<sub>SNOW</sub> for the western United States during (a) fall (Oct-Nov), (b) winter (Dec-Feb), (c) spring (Mar-Apr), and (d) for the cool season of the water year (Oct-Apr) for all gridpoints.**

a) ERA5 1981-2010 mean

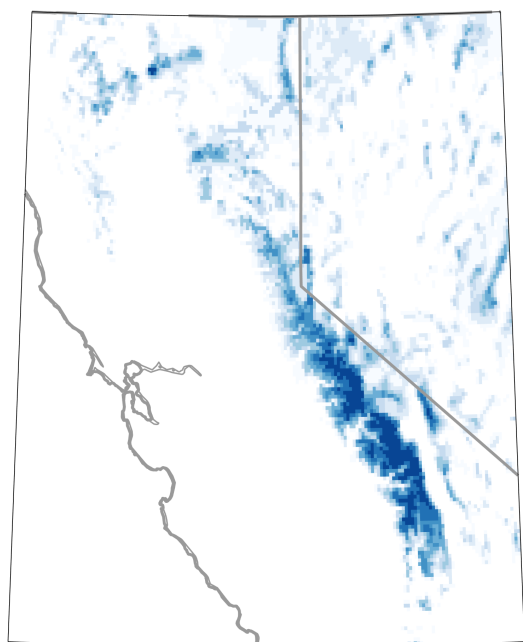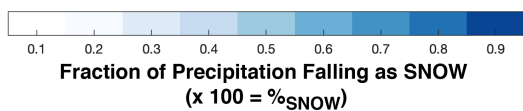

b) NCEP/NCAR 1981-2010 mean

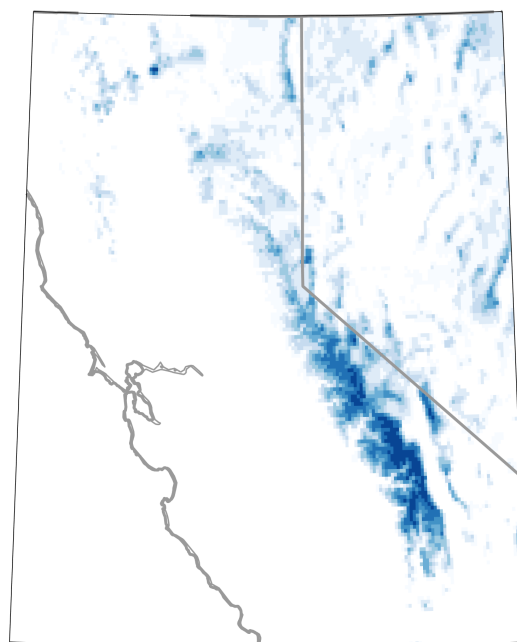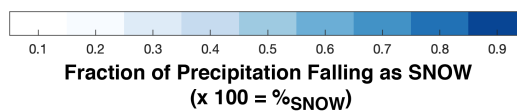

**Figure S3: Comparison of 1981-2010 mean water year fraction of precipitation falling as snow (multiply by 100 to yield %<sub>SNOW</sub>) for northern California and western Nevada produced using ERA-5 (a) with NCEP-NCAR (b).**

**a) Southern Cascades (Zone 1)**

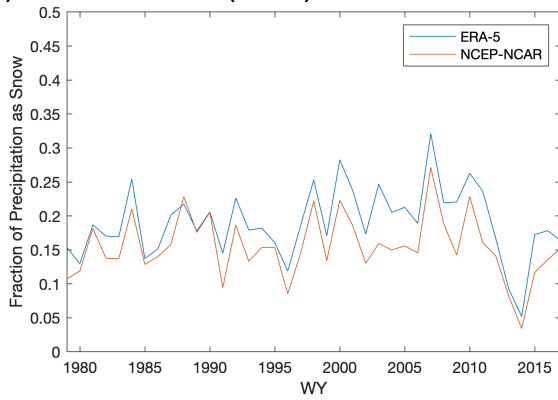

**b) Northern Sierra Nevada (Zone 2)**

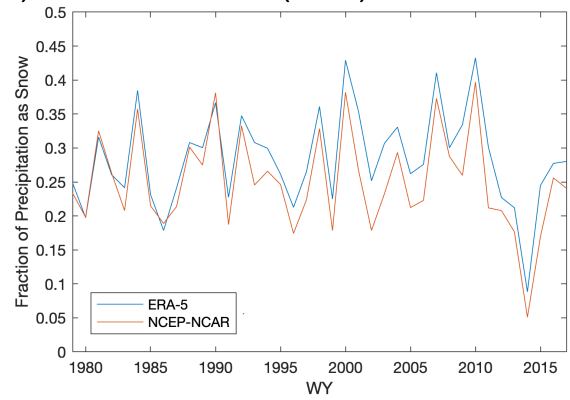

**c) Central Sierra Nevada (Zone 3)**

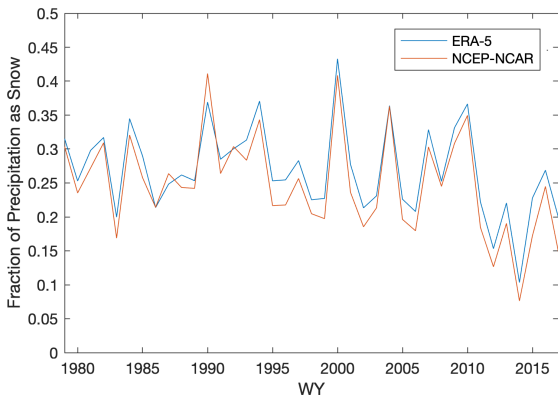

**d) Southern Sierra Nevada (Zone 4)**

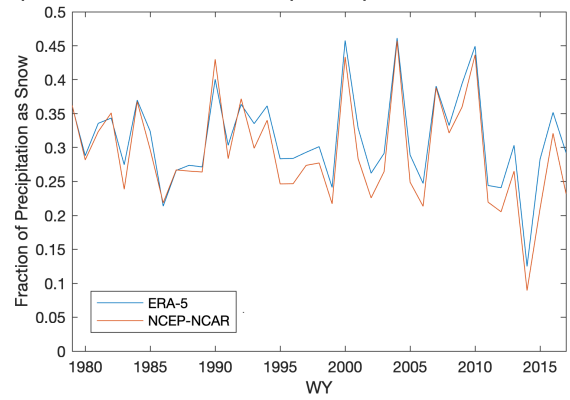

**Figure S4: Comparison of fraction of precipitation falling as snow for ERA-5 (blue line) and NCEP-NCAR (red line) for the period 1979-2018 for the four DWR analysis zones: (a) Southern Cascades, (b) Northern Sierra Nevada, (c) Central Sierra Nevada, and (d) Southern Sierra Nevada.**
